# Supplementary material for: High Solubilization and Controlled Release of Paclitaxel Using Thermosponge Nanoparticles for Effective Cancer Therapy
Source: MDPI journal article supplement (doi:10.3390/pharmaceutics13081150), 2021-07-27
Supplement: s1 [file s1]

# Supplementary Materials: High Solubilization and Controlled Release of Paclitaxel Using Thermosponge Nanoparticles for Effective Cancer Therapy

Jin Sil Lee, Hyeryeon Oh, Daekyung Sung, Jin Hyung Lee, Won Il Choi

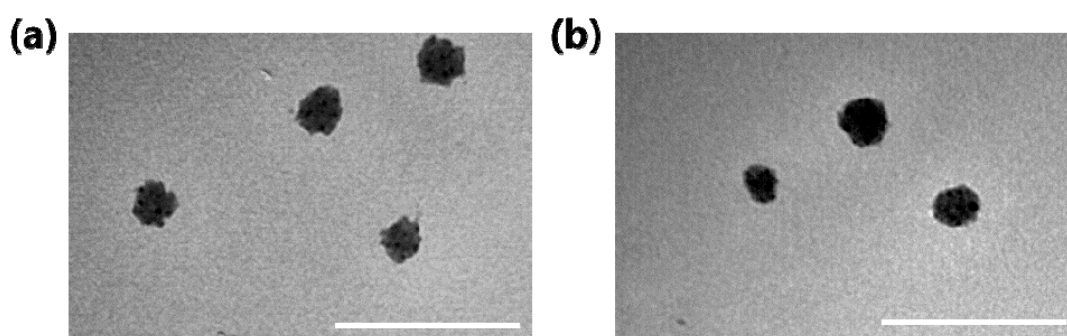

**Figure S1.** TEM images of (a) TNP and (b) PTX@TNP (180 wt). The scale bar indicates 200 nm.
